# Supplementary material for: Disparities in Prevalence and Barriers to Hypertension Control: A Systematic Review
Source: MDPI journal article supplement (doi:10.3390/ijerph192114571), 2022-11-06
Supplement: s1 [file ijerph-1906868-supplementary.pdf › ijerph-1906868-supplementary.pdf]

**Supplementary Table S1. Quality appraisal of the included studies using the risk of bias instrument for Cross-Sectional Surveys  
Contributed by the CLARITY Group.**

| Author & Country                    | 1. Is the source population representative of the population of interest? | 2. Is the response rate adequate?  | 3. Is there little missing data? | 4. Is the survey clinically sensible? | 5. Is there any evidence for the reliability and validity of the survey instrument? |
|-------------------------------------|---------------------------------------------------------------------------|------------------------------------|----------------------------------|---------------------------------------|-------------------------------------------------------------------------------------|
| Animut et al. 2018 [22]<br>Ethiopia | Probably yes                                                              | Probably yes                       | Probably no,                     | Definitely yes                        | Probably yes,                                                                       |
| Sibomana et al. 2019<br>Rwanada     | Probably no                                                               | Probably yes                       | Probably no                      | Probably yes                          | Probably no                                                                         |
| Wang et al. 2013 [12]<br>China      | Probably yes                                                              | Probably yes                       | Probably no                      | Definitely no                         | Definitely no                                                                       |
| Li et al. 2016 [13]<br>China        | Definitely yes (low risk of bias),                                        | Definitely yes (low risk of bias), | Probably no,                     | Probably yes,                         | Probably yes                                                                        |
| Xu et al. 2013 [14]<br>China        | Definitely yes                                                            | Definitely yes                     | Probably no,                     | Definitely no                         | Definitely no                                                                       |
| Chen et al. 2020 [15]<br>China      | Definitely yes                                                            | Definitely yes                     | Probably no,                     | Definitely no                         | Definitely no                                                                       |
| Lei wu et al. 2015<br>China         | Definitely yes                                                            | Definitely yes                     | Probably no,                     | Probably yes                          | Definitely no                                                                       |
| Xia et al. 2021<br>China            | Probably yes                                                              | Probably yes                       | Probably no                      | Probably yes                          | Probably no                                                                         |
| Devkota et al. 2016<br>Nepal        | Probably no                                                               | Probably yes                       | Probably no                      | Probably yes                          | Probably yes                                                                        |
| Dhungana et a. 2022 [26]<br>Nepal   | Definitely yes                                                            | Definitely yes                     | Probably no,                     | Definitely no                         | Definitely no                                                                       |
| Son et al. 2012 [27]<br>Vietnam     | Definitely yes                                                            | Definitely yes                     | Probably no,                     | Probably yes,                         | Probably yes,                                                                       |
| De Souza et al. 2014 [16]           | Probably yes                                                              | Probably yes                       | Probably no,                     | Probably yes,                         | Probably yes,                                                                       |

**Supplementary Table S1. Quality appraisal of the included studies using the risk of bias instrument for Cross-Sectional Surveys  
Contributed by the CLARITY Group.**

| Author & Country                       | 1. Is the source population representative of the population of interest? | 2. Is the response rate adequate? | 3. Is there little missing data? | 4. Is the survey clinically sensible? | 5. Is there any evidence for the reliability and validity of the survey instrument? |
|----------------------------------------|---------------------------------------------------------------------------|-----------------------------------|----------------------------------|---------------------------------------|-------------------------------------------------------------------------------------|
| Brazil                                 |                                                                           |                                   |                                  |                                       |                                                                                     |
| Lerner et al. 2013<br>Peru             | Probably no                                                               | Probably yes                      | Probably no                      | Probably yes                          | Probably yes                                                                        |
| Paquissi et al. 2016<br>Angola         | Definitely no                                                             | Probably yes                      | Probably no                      | Probably yes                          | Definitely no                                                                       |
| Okwuonu et al. 2014<br>[18]<br>Nigeria | Probably yes                                                              | Probably no                       | Probably yes                     | Probably yes,                         | Probably yes,                                                                       |
| Iloh et al., 2013 [19]<br>Nigeria      | Probably yes                                                              | Probably yes                      | Probably no,                     | Definitely yes<br>(low risk of bias), | Probably yes,                                                                       |
| Safro et al. 2018 [20]<br>Ghana        | Definitely yes                                                            | Definitely yes                    | Probably no,                     | Probably yes,                         | Probably no                                                                         |
| Harrison et al. 2021 [21]<br>Ghana     | Probably yes                                                              | Probably yes                      | Probably no,                     | Probably yes,                         | Probably no                                                                         |
| Gala et al. 2020 [23]<br>Botswana      | Probably yes                                                              | Probably yes                      | Probably no,                     | Probably yes,                         | Probably no                                                                         |
| Menanga et al. 2016 [24]<br>Cameroon   | Probably yes                                                              | Probably yes                      | Probably no,                     | Probably yes,                         | Probably no                                                                         |
| Duboz et al. 2014<br>Senegal           | Probably yes                                                              | Probably yes                      | Probably no,                     | Probably yes,                         | Probably no                                                                         |
| Zack et al. 2016<br>Tanzania           | Definitely yes                                                            | Definitely yes                    | Probably no,                     | Probably yes,                         | Probably no                                                                         |
| Nassr et al. 2019 [25]<br>Iraq         | Probably yes                                                              | Probably yes                      | Probably no,                     | Definitely no                         | Definitely no                                                                       |
| Zhang et al. 2019 [32]<br>Australia    | Definitely yes                                                            | Probably yes                      | Probably no,                     | Probably yes,                         | Probably no                                                                         |

**Supplementary Table S1. Quality appraisal of the included studies using the risk of bias instrument for Cross-Sectional Surveys  
Contributed by the CLARITY Group.**

| Author & Country                        | 1. Is the source population representative of the population of interest? | 2. Is the response rate adequate?     | 3. Is there little missing data? | 4. Is the survey clinically sensible? | 5. Is there any evidence for the reliability and validity of the survey instrument? |
|-----------------------------------------|---------------------------------------------------------------------------|---------------------------------------|----------------------------------|---------------------------------------|-------------------------------------------------------------------------------------|
| Liew et al. 2019 [38]<br>Singapore      | Definitely yes                                                            | Definitely yes                        | Probably no,                     | Probably yes,                         | Probably no                                                                         |
| Tiffe et al. 2019 [35]<br>Germany       | Probably yes                                                              | Probably yes                          | Probably no,                     | Probably yes,                         | Probably no                                                                         |
| Ham et al. 2011 [34]<br>South Korea     | Definitely yes                                                            | Probably yes                          | Probably no                      | Probably yes                          | Probably no                                                                         |
| Cordero et al. 2011 [37]<br>Spain       | Definitely yes                                                            | Definitely yes<br>(low risk of bias), | Probably no                      | Probably yes                          | Probably no                                                                         |
| Sandoval et a. 2012<br>Chile            | Definitely yes                                                            | Definitely yes                        | Probably no                      | Probably yes                          | Probably no                                                                         |
| Ting li et al. 2016<br>Hong Kong        | Definitely yes                                                            | Definitely yes                        | Probably no,                     | Probably yes,                         | Definitely yes                                                                      |
| Murphy et al. 2015<br>Ireland           | Definitely yes                                                            | Definitely yes                        | Probably no,                     | Probably yes,                         | Definitely no                                                                       |
| Khayyat et al. 2017<br>Saudi Arabia     | Probably no                                                               | Probably yes                          | Probably no                      | Probably yes                          | Probably no                                                                         |
| Santosa et al. 2020<br>Sweden and China | Definitely yes                                                            | Probably yes                          | Probably no,                     | Probably yes,                         | Probably no                                                                         |

Note: for all questions, there are four choices of responses: Definitely yes (low risk of bias), Probably yes, Probably no, Definitely no (high risk of bias)
